# Supplementary material for: Elovl2-Ablation Leads to Mitochondrial Membrane Fatty Acid Remodeling and Reduced Efficiency in Mouse Liver Mitochondria
Source: MDPI journal article supplement (doi:10.3390/nu14030559), 2022-01-27
Supplement: s1 [file s1]

## A. WT, TEM liver

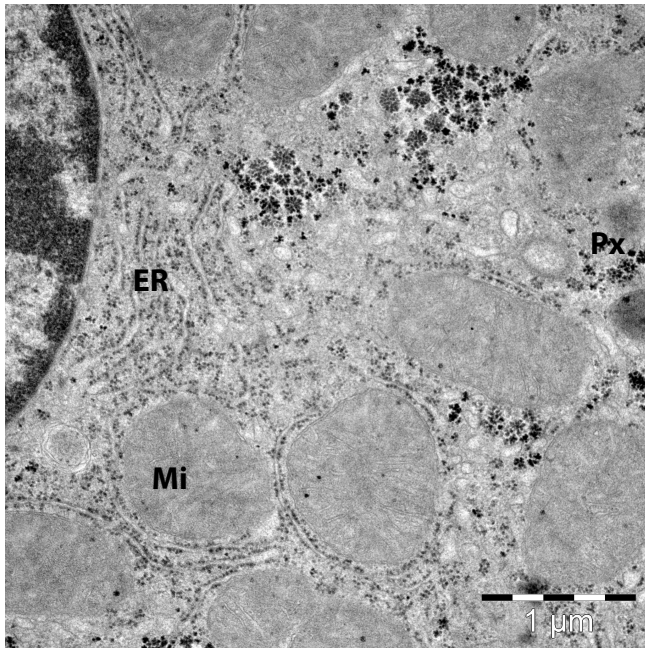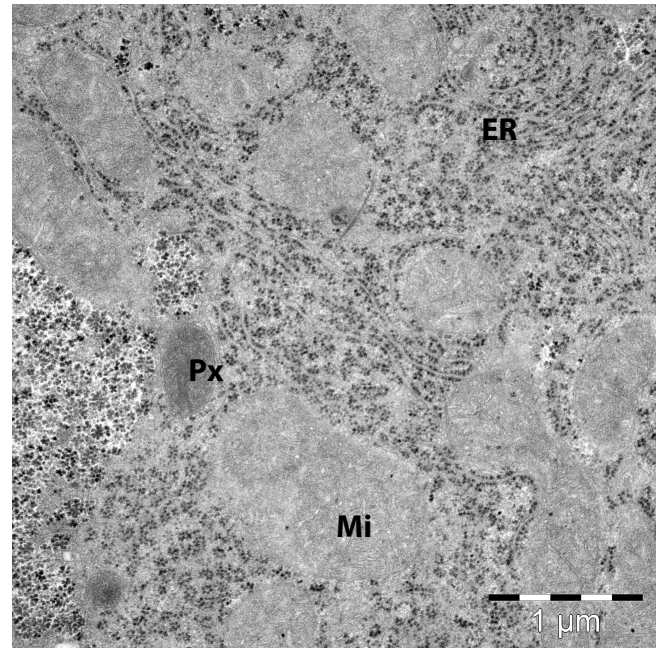

## B. Elovl2 KO, TEM liver

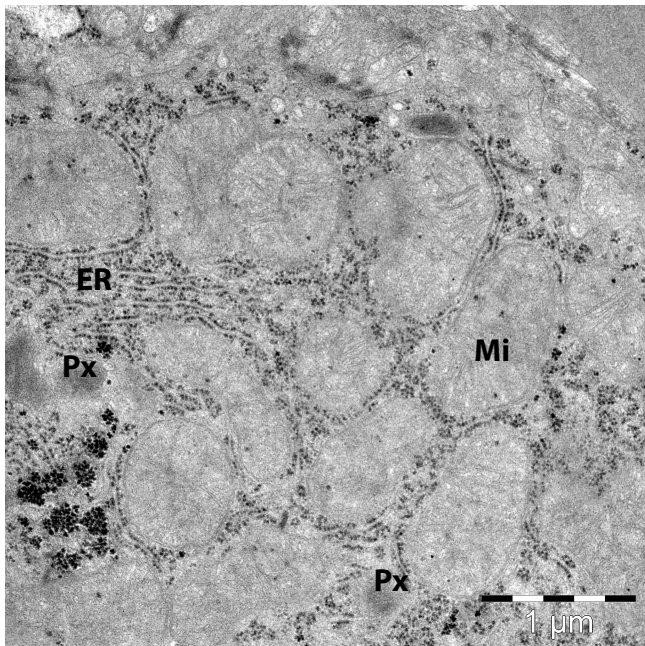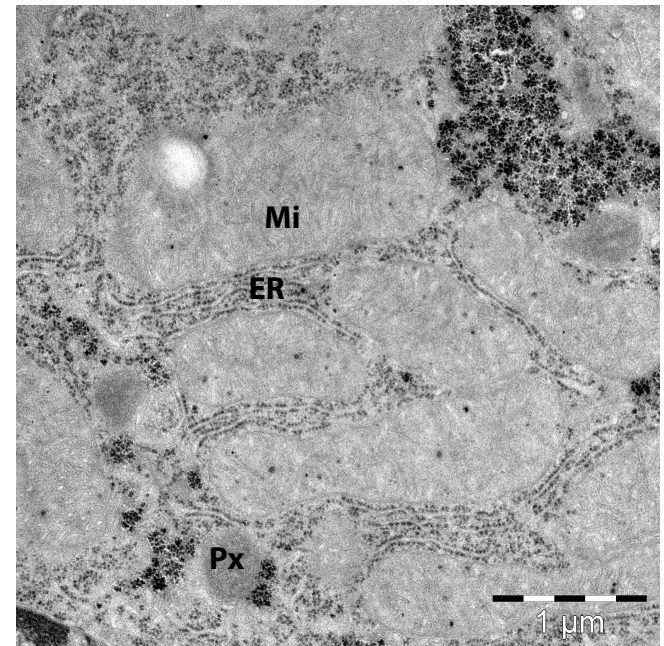

### Supplementary Figure S1 Morphology of liver tissue by electron microscopy

(A, B). Transmission electron microscopy images of the liver of two wild-type (WT) (A) and two Elovl2 KO (B) mice, showing higher number of mitochondria (Mi) and peroxisomes (Px) and no difference in Endoplasmic Reticulum (ER).

**Table S1. Fatty acid composition in isolated mitochondria from liver of WT and Elovl2 KO mice.** Graphic presentation of these results is on Figure 2A.

| Fatty acid | Genotype | N | Mean    | SD     | SEM    | P     |
|------------|----------|---|---------|--------|--------|-------|
| f14:0      | WT       | 6 | 0.2680  | 0.0721 | 0.0294 | 0.330 |
|            | Elovl2KO | 6 | 0.3177  | 0.0947 | 0.0387 |       |
| f16:0      | WT       | 6 | 23.6732 | 2.5378 | 1.0361 | 0.066 |
|            | Elovl2KO | 6 | 21.3100 | 1.2019 | 0.4907 |       |
| f16:1n-7   | WT       | 6 | 1.2829  | 0.3468 | 0.1416 | 0.207 |
|            | Elovl2KO | 6 | 0.9836  | 0.4191 | 0.1711 |       |
| f18:0      | WT       | 6 | 11.4885 | 0.5138 | 0.2098 | 0.116 |
|            | Elovl2KO | 6 | 12.4669 | 1.2952 | 0.5288 |       |
| f18:1n-9   | WT       | 6 | 23.7935 | 4.0125 | 1.6381 | 0.001 |
|            | Elovl2KO | 6 | 32.7314 | 2.5632 | 1.0464 |       |
| f18:2n-6   | WT       | 6 | 9.7808  | 2.3679 | 0.9667 | 0.041 |
|            | Elovl2KO | 6 | 7.2292  | 1.2288 | 0.5017 |       |
| f18:3n-3   | WT       | 6 | 0.5593  | 0.1576 | 0.0643 | 0.212 |
|            | Elovl2KO | 6 | 0.7352  | 0.2819 | 0.1151 |       |
| f18:4n-3   | WT       | 6 | 0.9894  | 0.5604 | 0.2288 | 0.235 |
|            | Elovl2KO | 6 | 1.2950  | 0.1911 | 0.0780 |       |
| f20:0      | WT       | 6 | 0.6237  | 0.2909 | 0.1188 | 0.720 |
|            | Elovl2KO | 6 | 0.6849  | 0.2844 | 0.1161 |       |
| f20:1n-9   | WT       | 6 | 0.9832  | 0.3188 | 0.1302 | 0.608 |
|            | Elovl2KO | 6 | 1.0666  | 0.2166 | 0.0884 |       |
| f20:2n-6   | WT       | 6 | 0.5472  | 0.1015 | 0.0414 | 0.027 |
|            | Elovl2KO | 6 | 0.6856  | 0.0823 | 0.0336 |       |
| f20:3n-6   | WT       | 6 | 3.0741  | 0.6068 | 0.2477 | 0.060 |
|            | Elovl2KO | 6 | 3.6384  | 0.2422 | 0.0989 |       |
| f20:4n-6   | WT       | 6 | 12.2402 | 1.0644 | 0.4345 | 0.019 |
|            | Elovl2KO | 6 | 9.9792  | 1.6809 | 0.6863 |       |
| f20:5n-3   | WT       | 6 | 0.4399  | 0.1272 | 0.0519 | 0.001 |
|            | Elovl2KO | 6 | 0.7688  | 0.1160 | 0.0474 |       |
| f22:0      | WT       | 6 | 0.4821  | 0.1907 | 0.0778 | 0.007 |
|            | Elovl2KO | 6 | 0.8174  | 0.1550 | 0.0633 |       |
| f22:4n-6   | WT       | 6 | 0.4793  | 0.0494 | 0.0202 | 0.077 |
|            | Elovl2KO | 6 | 0.6258  | 0.1754 | 0.0716 |       |
| f22:5n-6   | WT       | 6 | 0.8634  | 0.2754 | 0.1124 | 0.030 |
|            | Elovl2KO | 6 | 0.5653  | 0.0853 | 0.0348 |       |
| f22:5n-3   | WT       | 6 | 1.1844  | 0.3819 | 0.1559 | 0.001 |
|            | Elovl2KO | 6 | 2.4261  | 0.4595 | 0.1876 |       |
| f24:0      | WT       | 6 | 0.4104  | 0.0674 | 0.0275 | 0.945 |
|            | Elovl2KO | 6 | 0.4066  | 0.1142 | 0.0466 |       |
| f22:6n-3   | WT       | 6 | 6.2815  | 0.5643 | 0.2304 | 0.001 |
|            | Elovl2KO | 6 | 0.7274  | 0.1783 | 0.0728 |       |
| f24:5n-3   | WT       | 6 | 0.2824  | 0.1520 | 0.0621 | 0.942 |
|            | Elovl2KO | 6 | 0.2756  | 0.1661 | 0.0678 |       |
| f24:6n-3   | WT       | 6 | 0.2724  | 0.1592 | 0.0650 | 0.910 |
|            | Elovl2KO | 6 | 0.2633  | 0.1081 | 0.0441 |       |

## Acyl chain lenght

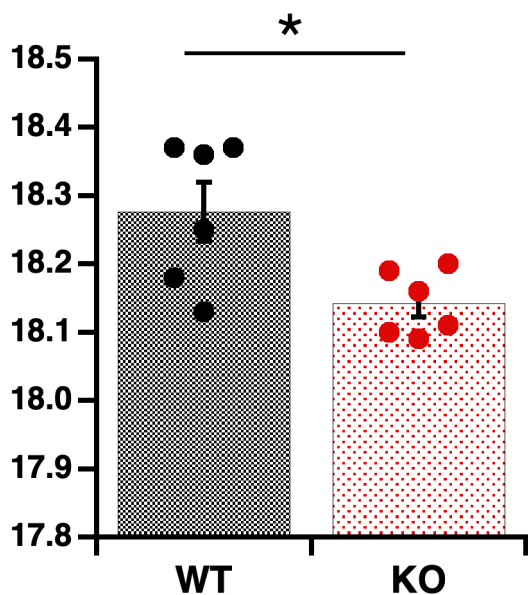

### Supplementary Figure S2

Acyl chain length (ACL) of mitochondrial fatty acids from wild-type and Elovl2 KO mice. For calculation of ACL value (number of carbon atoms), see the Materials and Methods section.

Values are means  $\pm$  SEM from 6 different mitochondrial preparation for each mouse genotype. Significant differences are shown between wild-type and Elovl2 KO mice: \*  $P < 0.05$ .

## Relative amount oxidative damage markers

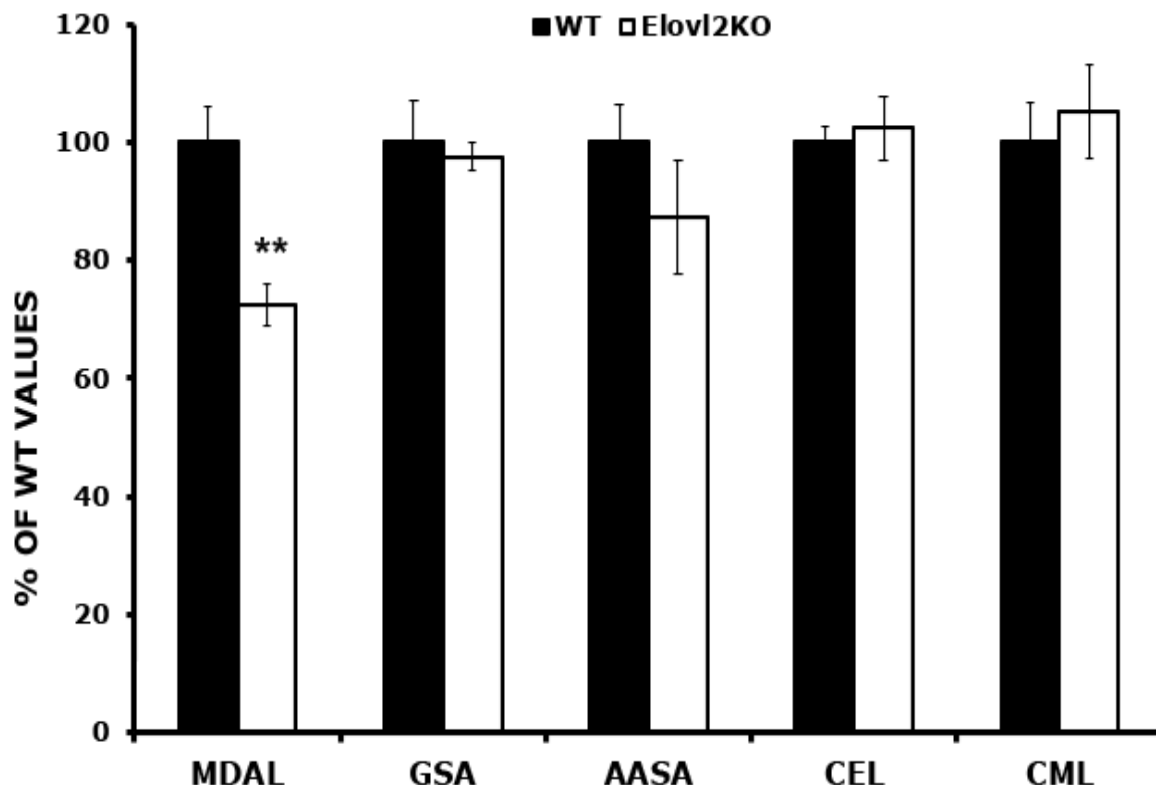

### Supplementary Figure S3

Lipoxidation (MDAL), protein oxidation (GSA, AASA), and glycoxidation (CEL, CML) damage indicators in liver mitochondria from WT and Elovl2 KO mice.

Values are means  $\pm$  SEM from 6 different mitochondrial preparation for each mouse genotype and expressed as a percentage of wild-type animals. Absolute values are presented in Figure 3. Significant differences are shown between wild-type and Elovl2 KO mice, \*\*  $P < 0.01$ .

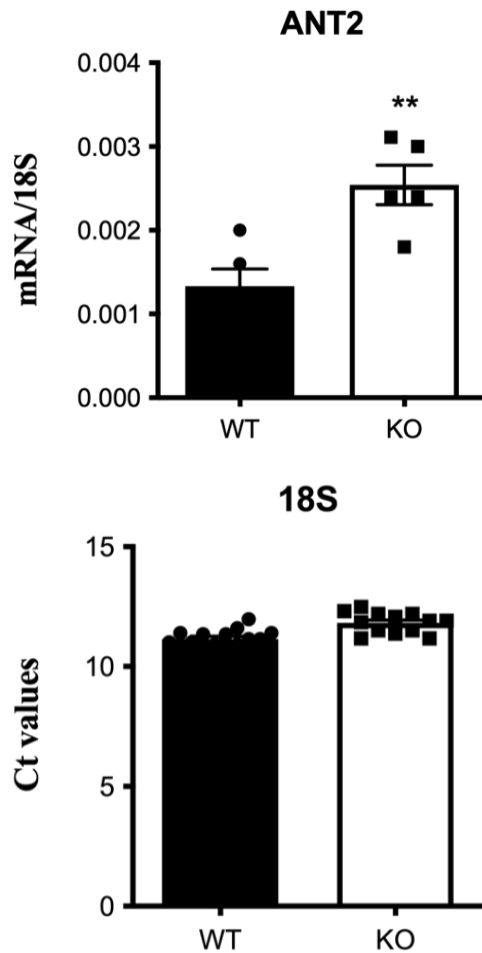

## Supplementary Figure S4

Gene expression of ANT2 from WT and Elov12 KO liver.

18S is used as house-keeping gene and all CT values are presented in the figure.

Results are shown as  $\pm$  SEM from 5 different liver samples of each genotype.

Significant differences are shown between WT and Elov12 KO mice. \*\*  $P < 0.01$ .
